# Supplementary material for: Molecular Characterization of Newcastle Disease Virus from Backyard Poultry Farms and Live Bird Markets in Kenya
Source: Hindawi journal article supplement (doi:10.1155/2018/2368597), 2018-08-05
Supplement: f1 [file 2368597.f1.pdf]

Table S1: The Fusion gene reference sequences from GenBank and study sequences used in analysis

| Accession No | Species            | Country of origin | Isolate name                               | Year of collection | Genotype |
|--------------|--------------------|-------------------|--------------------------------------------|--------------------|----------|
| AB465607     | Chicken            | Japan             | Japan/Ishi/62                              | 1962               | I        |
| Z12110       | Chicken            | Ireland           | Ulster Mutant                              | 1967               | I        |
| AY935492     | Chicken            | Australia         | 98-1249                                    | 1998               | I        |
| AY935499     | Chicken            | Australia         | I-2vaccine                                 | 2005               | I        |
| AY935500     | Chicken            | Australia         | I-2progenitor                              | 2005               | I        |
| FJ600539     | Mule duck          | China             | FJ0801                                     | 2008               | I        |
| HM063424     | Water rail         | China             | R8/Guang-dong                              | 2005               | I        |
| AF077761     | Chicken            | USA               | Lasota                                     | 1946               | II       |
| AF309418     |                    | USA               | B1                                         | 1947               | II       |
| AY225110     |                    | China             | HB92/V4                                    |                    | II       |
| EU289028     | Turkey             | USA               | VG/GA                                      | 1987               | II       |
| EF201805     |                    | ---               | Mukteswar                                  | 1940               | III      |
| EF211808     | Goose              | China             | JS/2/05/Go                                 | 1940               | III      |
| EF430159     | Chicken            | China             | JS/7/05Ch                                  | 1940               | III      |
| EF589136     | Fowl               | China             | Guizhou                                    | 1940               | III      |
| FJ480786     | Mallard            | China             | NDV/Mallard/HLJ383/06                      | 1940               | III      |
| AY741404     |                    | UK                | Herts/33                                   | 1940               | IV       |
| EU293914     |                    | China             | Italian                                    | 1940               | IV       |
| GU187941     | Chicken            | India             | NDV-2//Namakkal/ Tamil Nadu                | 1940               | IV       |
| M24702       |                    | UK                | Herts33                                    | 1940               | IV       |
| AF163440     |                    | China             | F48E9                                      |                    | IX       |
| AY341061     | Chicken            | China             | LuoY                                       |                    | IX       |
| FJ436302     | Chicken            | China             | F48E8                                      | 1946               | IX       |
| FJ436304     | Chicken            | China             | FJ01/85                                    | 1985               | IX       |
| FJ436306     | Duck               | China             | JS/1/02                                    | 2002               | IX       |
| FJ705459     | Cormorant          | Canada            | Cormorant/98CNN3-V1125/1998                | 1998               | V a      |
| FJ705460     | Cormorant          | Canada            | Cormorant/95DC02150/1995                   | 1995               | V a      |
| FJ705461     | Cormorant          | Canada            | Cormorant/95DC2345/1995                    | 1995               | V a      |
| JN872161     | Cormorant          | USA               | Cormorant/Wisconsin/498260-2/07            | 1997               | V a      |
| AY288993     | Chicken            | Honduras          | Chicken/Honduras/15/00                     | 2000               | V b      |
| AY562987     | Fowl               | USA               | Gamefowl/U.S.(CA)/211472/02                | 2002               | V b      |
| AY562990     | Psittacine         | USA               | Largo/71                                   | 1971               | V b      |
| EF520718     | Gamefowl           | USA               | Gamefowl/US (CA)/212676/2002               | 2002               | V b      |
| JN872181     | Chicken            | Honduras          | Chicken/Honduras/44813/2000                | 2000               | V b      |
| JN942027     | Chicken            | Nicaragua         | Fighting Cock/Nicaragua/95066-9/2001       | 2001               | V b      |
| JN942039     | Amazon parrot      | USA               | Amazon/California/28936/1988               | 1988               | V b      |
| EU518683     | Chicken            | Mexico            | Chicken/Mexico (Estado de Mexico)/465/2005 | 2005               | V c      |
| KJ577136     | Chicken            | Mexico            | Chimalhuacan                               | 1973               | V c      |
| HM117720     | Chicken            | Mexico            | NDV-P05                                    | 2005               | V c      |
| JQ697743     | Chicken            | Mexico            | Chicken/MX/NC02-634/2010                   | 2010               | V c      |
| JQ697744     | Chicken            | Mexico            | Chicken/MX/NC04-635/2010                   | 2010               | V c      |
| JX974435     | Chicken            | Mexico            | NDV1/10                                    | 2010               | V c      |
| KC808508     | Gamefowl           | Mexico            | Gamefowl/Mex/616/2008                      | 2008               | V c      |
| KC808509     | Gamefowl           | Mexico            | Gamefowl/Mex(DF)/619/2008                  | 2008               | V c      |
| KC808510     | Scarlet macaw      | Mexico            | Scarlet macaw/Mex(Chiapas)/672-ZM12/2009   | 2009               | V c      |
| AF218134     | Pheasant           | Italy             | IT-47                                      | 1974               | Va       |
| AF218136     | Turkey             | Italy             | IT-51B                                     | 1972               | Va       |
| AF525370     | Chicken            | Germany           | DE-173                                     | 1970               | Va       |
| AF525375     | Chicken            | Germany           | DE-183                                     | 1974               | Va       |
| AF525377     | Amazon             | Germany           | DE-190                                     | 1970               | Va       |
| AF525396     |                    | Yugoslavia        | Yu(Vo)-1744                                | 2002               | Va       |
| AY116971     |                    | Slovenija         | HR-448                                     | 1979               | Va       |
| AY444496     | Yellow nape parrot | USA               | U.S(MA)/19120/87                           | 1987               | Va       |
| EF065682     | Chicken            | USA               | rAnhinga                                   |                    | Va       |

|          |                         |                   |                                     |      |                |
|----------|-------------------------|-------------------|-------------------------------------|------|----------------|
| GQ288382 | Cormorant               | Canada            | Cormorant/98 CNN3-V1125DC02150/1998 | 1998 | Va             |
| GQ288383 | Cormorant               | Canada            | Cormorant/Canada/95DC02150/1995     | 1995 | Va             |
| GQ288387 | Cormorant               | USA (MN)          | Cormorant/US (MN) 92-40140/1992     | 1992 | Va             |
| GQ288388 | Cormorant               | USA (CA)          | Cormorant/US(CA)/92-23071/1992      | 1992 | Va             |
| AF402118 |                         | Bulgaria          | BG-55                               | 1975 | Va             |
| HG937573 | Chicken                 | Uganda            | NDV/chicken/Uganda/MU024/2011       | 2011 | Vd             |
| HG937580 | Chicken                 | Uganda            | NDV/chicken/Uganda/MU040/2011       | 2011 | Vd             |
| JQ217418 | Chicken                 | Kenya             | A89                                 | 2010 | Vd             |
| JQ217419 | Chicken                 | Kenya             | A48                                 | 2010 | Vd             |
| JQ217420 | Chicken                 | Kenya             | A148                                | 2010 | Vd             |
| KY007043 | Chicken                 | Kenya(Nairobi)    | NDV/KE0576/2015                     | 2015 | Study sequence |
| KY007044 | Chicken                 | Kenya(Nairobi)    | NDV/KE0733/2015                     | 2015 | Study sequence |
| KY007045 | Chicken                 | Kenya Makueni)    | NDV/KE0679/2015                     | 2015 | Study sequence |
| KY007046 | Chicken                 | Kenya (Bomet)     | NDV/KE0673/2015                     | 2015 | Study sequence |
| KY007047 | Chicken                 | Kenya (Kitui)     | NDV/KE0601/2015                     | 2015 | Study sequence |
| KY007048 | Chicken                 | Kenya (Bungoma)   | NDV/KE1002/2016                     | 2016 | Study sequence |
| KY007049 | Chicken                 | Kenya (Makueni)   | NDV/KE0678/2015                     | 2015 | Study sequence |
| KY007050 | Chicken                 | Kenya (Bungoma)   | NDV/KE0697/2015                     | 2015 | Study sequence |
| KY007051 | Chicken                 | Kenya (Homabay)   | NDV/KE0695/2015                     | 2015 | Study sequence |
| KY007052 | Chicken                 | Kenya (Homabay)   | NDV/KE0687/2015                     | 2015 | Study sequence |
| KY007053 | Chicken                 | Kenya (Makueni)   | NDV/KE0676/2015                     | 2015 | Study sequence |
| KY007054 | Chicken                 | Kenya (Busia)     | NDV/KE2055/2016                     | 2016 | Study sequence |
| KY007055 | Chicken                 | Kenya (Busia)     | NDV/KE2054/2015                     | 2015 | Study sequence |
| KY007056 | Chicken                 | Kenya (Migori)    | NDV/KE0715/2015                     | 2015 | Study sequence |
| KY007057 | Chicken                 | Kenya (Bungoma)   | NDV/KE1004/2016                     | 2016 | Study sequence |
| KY007058 | Chicken                 | Kenya (Kitengela) | NDV/KE0525/2015                     | 2015 | Study sequence |
| KY007059 | Chicken                 | Kenya (Kilifi)    | NDV/KE0410/2015                     | 2015 | Study sequence |
| KY007060 | Chicken                 | Kenya (Machakos)  | NDV/KE0647/2015                     | 2015 | Study sequence |
| KY007061 | Chicken                 | Kenya (Nairobi)   | NDV/KE0638/2015                     | 2015 | Study sequence |
| KY007062 | Chicken                 | Kenya (Malaba)    | NDV/KE0660/2015                     | 2015 | Study sequence |
| KY007063 | Chicken                 | Kenya (Kitengela) | NDV/KE0523/2015                     | 2015 | Study sequence |
| MG988405 | Chicken                 | Kenya (Busia)     | NDV/KE1007/2016                     | 2016 | Study sequence |
| AY288995 | Dove                    | Italy             | Dove/Italy/2736/00                  | 2000 | VI             |
| AY288996 | Pigeon                  | Italy             | Pigeon/Italy/1166/00                | 2000 | VI             |
| AY288997 | Chicken                 | Kenya             | Chicken/Kenya/139/90                | 1990 | VI             |
| FJ865434 | Pigeon                  | China             | S-1                                 | 2002 | VI             |
| GQ507801 | Chicken                 | South Korea       | Kr-102/89                           | 1989 | VI             |
| JX518532 | laughing Dove           | Kenya             | Laughing Dove/B2/Kenya/Isiolo       | 2012 | VI             |
| AY444497 |                         | Indonesia         | Moluccan/Indonesia/904/87           | 1987 | VII            |
| GQ288381 | Cormorant               | USA (CA)          | Cormorant/US(CA)/D9704285/1997      | 1997 | VII            |
| AF358786 | Chicken                 | Taiwan            | TW/2000                             | 2000 | VII            |
| AF458010 | Chicken                 | China             | JS-3/00                             | 2000 | VII            |
| GQ245818 | Ostrich                 | China             | YZ-22-07-Os                         | 2007 | VII            |
| GU227738 | Dove                    | Serbia            | NDV/Serbia/749/2007                 | 2007 | VII            |
| AY734534 | Chicken                 | Argentina         | Trenque Lauquen                     | 1970 | VIII           |
| FJ751918 | Chicken                 | China             | QH1                                 | 1979 | VIII           |
| FJ751919 | Chicken                 | China             | QH4                                 | 1985 | VIII           |
| FJ705464 | Mallard                 | USA               | Mallard/US(OH)/04-411/2004          | 2004 | X              |
| FJ705467 | Mallard                 | USA               | Mallard/US(MN)/MN00-32/2000         | 2000 | X              |
| FJ705468 | Mottled duck            | USA               | Mottled duck/US(TX)/TX01-130/2001   | 2001 | X              |
| HQ266602 | Chicken                 | Madagascar        | MG/725/08                           | 2008 | XI             |
| HQ266603 | Chicken                 | Madagascar        | MG/1992/08                          | 2008 | XI             |
| HQ266604 | Chicken                 | Madagascar        | MG/Meola/08                         | 2008 | XI             |
| JN627504 | goose                   | China             | Goose/China-GD/12/2011              | 2011 | XII            |
| JN627506 | Goose                   | China             | Goose/China-GD/20/2011              | 2011 | XII            |
| JN627507 | goose                   | China             | Goose/China-GD/1003/2010            | 2010 | XII            |
| JN627508 | goose                   | China             | Goose/China-GD/450/2011             | 2011 | XII            |
| JN800306 | Chicken                 | Peru              | Poultry/Peru/1918-03/2008           | 2008 | XII            |
| AY865652 | <i>Sterna albifrons</i> | Russia            | Sterna/Astr/2755/2001               | 2001 | XIII           |
| GU182323 | Chicken                 | Pakistan          | SPVC/Karachi/NDV/43/2008            | 2008 | XIII           |
| GU182331 | Chicken                 | Pakistan          | SPVC/Karachi/NDV/33/2007            | 2007 | XIII           |

|          |         |                    |                                |      |         |
|----------|---------|--------------------|--------------------------------|------|---------|
| JN682190 | Chicken | Pakistan           | Chicken/CP/Islamabad2/2010     | 2010 | XIII    |
| HF969214 | Chicken | Nigeria            | Chicken/Nigeria/NIE10-333/2011 | 2011 | XIV     |
| JX119193 | Chicken | Dominican Republic | DominicanRepublic//499-31/2008 | 2008 | XVI     |
| JX186997 | Chicken | Dominican Republic | Dominican/Republic/867/2008    | 2008 | XVI     |
| JX915242 | Chicken | Dominican Republic | DominicanRepublic/28138-4/1986 | 1986 | XVI     |
| JX915243 | Chicken | Mexico             | Mexico/Queretaro/452/1947      | 1947 | XVI     |
| HF969184 | Chicken | Ivory Coast        | CIV08-103                      | 2007 | XVII    |
| FJ772446 |         | Nigeria            | Avian/913-1/Nigeria/2006       | 2006 | XVII    |
| FJ772449 |         | Nigeria            | Avian/913-33/Nigeria/2006      | 2006 | XVII    |
| FJ772455 |         | Mauritania         | Avian/1532/14/Mauritania/2006  | 2006 | XVIII   |
| FJ772466 | Chicken | IvoryCoast         | Chicken/2601/Ivory Coast/2008  | 2008 | XVIII   |
| HF969127 | Chicken | Ivory Coast        | CIV08-069                      | 2007 | XVIII   |
| EF612277 |         | USA                | AK/196                         | 1998 | Class I |

---

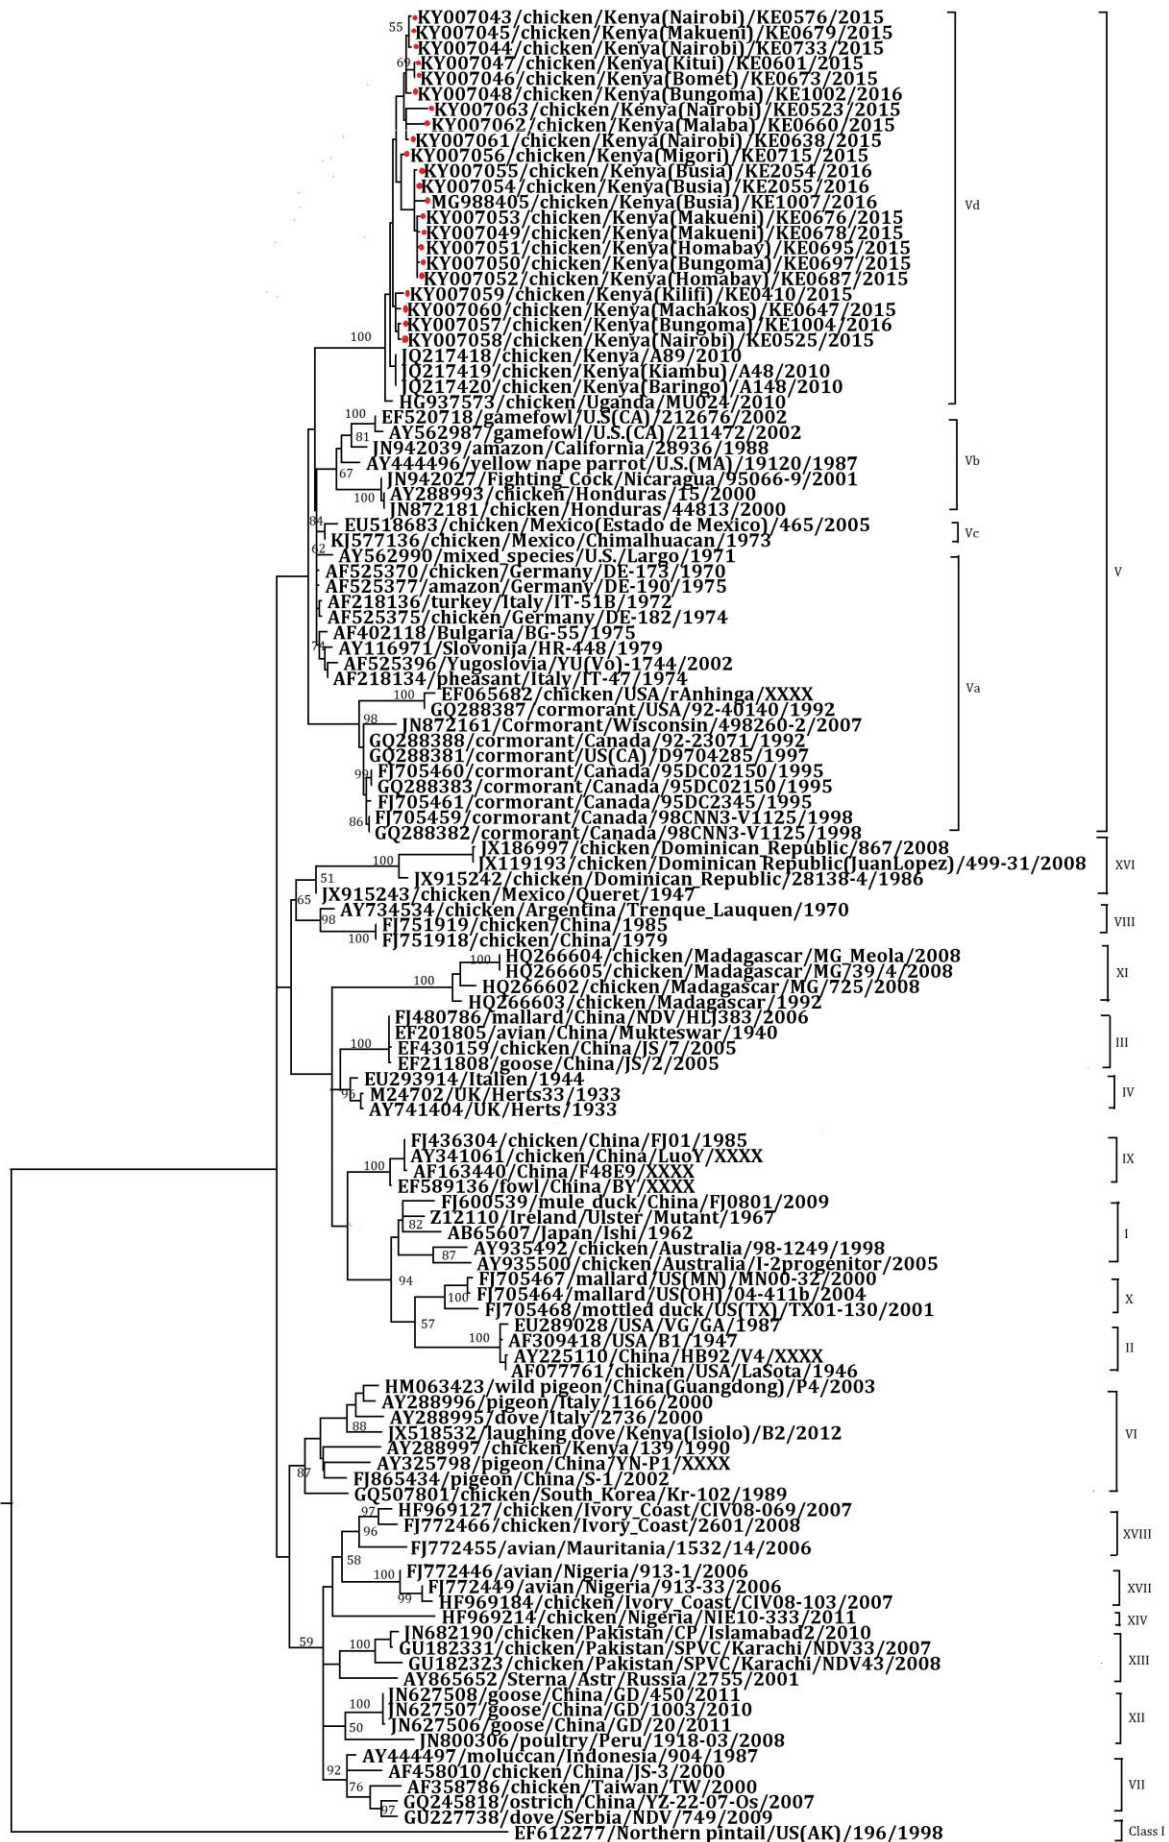

Figure S2: Phylogenetic tree of nucleotide sequence of the partial Fusion (F) gene (374bp) of Newcastle disease virus (NDV) in the study (● marked) and reference sequences for NDV from GenBank including representatives of genotype V from various parts of the world (including Europe). The evolutionary history was inferred by using the Maximum Likelihood method based on the Kimura-2 parameter. The analysis involved 119 nucleotide sequences. The tree is rooted. The analyses were conducted in MEGA
